# Supplementary material for: Machine learning bandgaps of double perovskites
Source: PubMed Central journal article supplement (PMC4726030; doi:10.1038/srep19375), 2016-01-19
Supplement: srep19375-s1.pdf [file srep19375-s1.pdf]

# Supplemental Information for

## Machine learning bandgaps of double perovskites

**G. Pilania<sup>1,\*</sup>, A. Mannodi-Kanakkithodi<sup>2</sup>, B. P. Uberuaga<sup>1</sup>, R. Ramprasad<sup>2</sup>, J. E. Gubernatis<sup>3</sup>, and T. Lookman<sup>3</sup>**

<sup>1</sup>Materials Science and Technology Division, Los Alamos National Laboratory, Los Alamos 87545, NM, USA

<sup>2</sup>Department of Materials Science & Engineering and Institute of Materials Science, University of Connecticut, Storrs, 06269 CT USA

<sup>3</sup>Theoretical Division, Los Alamos National Laboratory, Los Alamos 87545, NM, USA

\*gpilania@lanl.gov

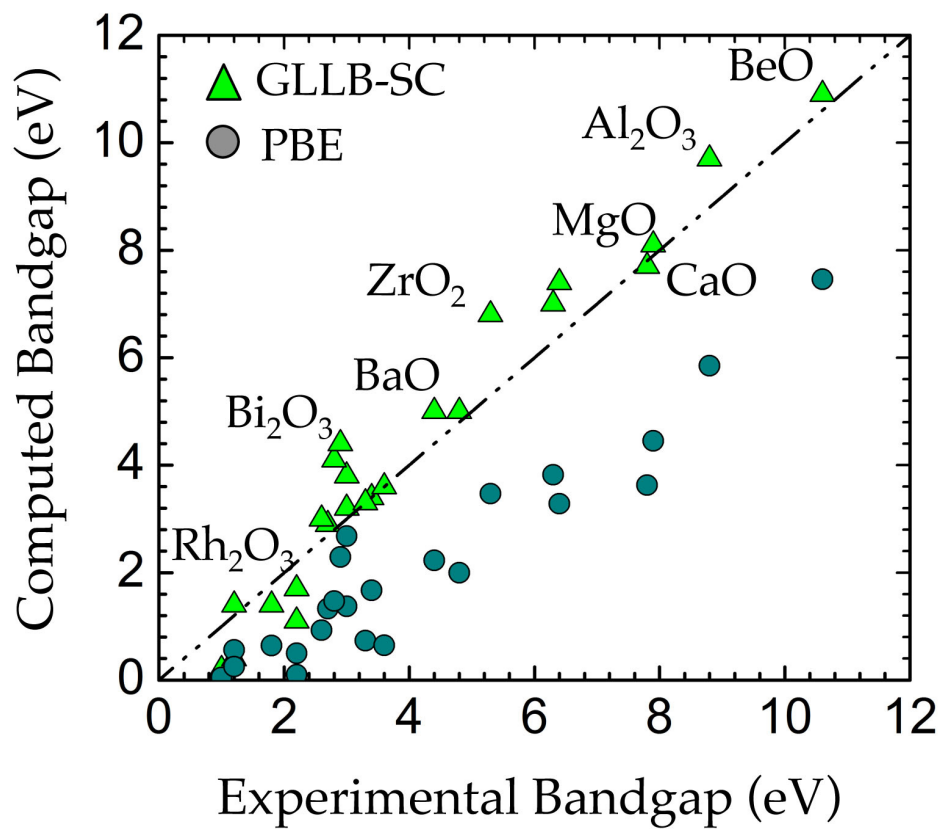

**Table 1. Identified optimal primary  $\Omega$ -D descriptors.**

| Primary features and optimal primary $\Omega$ -D descriptors |                        |                                       |                                                                                                         |
|--------------------------------------------------------------|------------------------|---------------------------------------|---------------------------------------------------------------------------------------------------------|
| Down-selected primary features                               |                        | Identities of the primary descriptors |                                                                                                         |
| Primary feature                                              | Feature representation | Descriptor dimension                  | Descriptor representation                                                                               |
| $f_1$                                                        | $r_{dA}^+$             | 1-D                                   | $[f_2]$                                                                                                 |
| $f_2$                                                        | $l_A^+$                | 2-D                                   | $[f_2, f_{13}]$                                                                                         |
| $f_3$                                                        | $h_A^+$                | 3-D                                   | $[f_2, f_9, f_{13}]$                                                                                    |
| $f_4$                                                        | $\chi_A^-$             | 4-D                                   | $[f_2, f_5, f_9, f_{12}]$                                                                               |
| $f_5$                                                        | $\chi_B^+$             | 5-D                                   | $[f_2, f_5, f_9, f_{12}, f_{13}]$                                                                       |
| $f_6$                                                        | $r_{dA}^-$             | 6-D                                   | $[f_2, f_3, f_5, f_9, f_{12}, f_{13}]$                                                                  |
| $f_7$                                                        | $l_B^-$                | 7-D                                   | $[f_2, f_3, f_5, f_7, f_9, f_{12}, f_{13}]$                                                             |
| $f_8$                                                        | $r_{dB}^+$             | 8-D                                   | $[f_2, f_3, f_5, f_7, f_9, f_{12}, f_{13}, f_{15}]$                                                     |
| $f_9$                                                        | $\chi_B^-$             | 9-D                                   | $[f_2, f_3, f_4, f_5, f_7, f_9, f_{12}, f_{13}, f_{15}]$                                                |
| $f_{10}$                                                     | $r_{dB}^-$             | 10-D                                  | $[f_2, f_3, f_4, f_5, f_7, f_9, f_{12}, f_{13}, f_{15}, f_{16}]$                                        |
| $f_{11}$                                                     | $l_B^+$                | 11-D                                  | $[f_1, f_2, f_3, f_4, f_5, f_7, f_9, f_{12}, f_{13}, f_{15}, f_{16}]$                                   |
| $f_{12}$                                                     | $l_A^-$                | 12-D                                  | $[f_1, f_2, f_3, f_4, f_5, f_7, f_9, f_{12}, f_{13}, f_{14}, f_{15}, f_{16}]$                           |
| $f_{13}$                                                     | $h_B^+$                | 13-D                                  | $[f_1, f_2, f_3, f_4, f_5, f_7, f_9, f_{11}, f_{12}, f_{13}, f_{14}, f_{15}, f_{16}]$                   |
| $f_{14}$                                                     | $h_A^-$                | 14-D                                  | $[f_1, f_2, f_3, f_4, f_5, f_6, f_7, f_9, f_{11}, f_{12}, f_{13}, f_{14}, f_{15}, f_{16}]$              |
| $f_{15}$                                                     | $h_B^-$                | 15-D                                  | $[f_1, f_2, f_3, f_4, f_5, f_6, f_7, f_9, f_{10}, f_{11}, f_{12}, f_{13}, f_{14}, f_{15}, f_{16}]$      |
| $f_{16}$                                                     | $r_{sA}^-$             | 16-D                                  | $[f_1, f_2, f_3, f_4, f_5, f_6, f_7, f_8, f_9, f_{10}, f_{11}, f_{12}, f_{13}, f_{14}, f_{15}, f_{16}]$ |

**Table 2. Identified optimal compound  $\Omega$ -D descriptors.**

| Compound features and optimal compound $\Omega$ -D descriptors |                                                                  |                                        |                                                                                                           |
|----------------------------------------------------------------|------------------------------------------------------------------|----------------------------------------|-----------------------------------------------------------------------------------------------------------|
| Down-selected compound features                                |                                                                  | Identities of the compound descriptors |                                                                                                           |
| Compound feature                                               | Feature representation                                           | Descriptor dimension                   | Descriptor representation                                                                                 |
| $f_1$                                                          | $(r_{sA}^+)^2 \cdot (I_A^+)^3 \cdot \sqrt{(I_A^+)}$              | 1-D                                    | [ $f_1$ ]                                                                                                 |
| $f_2$                                                          | $(r_{sA}^+)^2 \cdot (I_A^+)^3 \cdot \exp(\chi_B^-)$              | 2-D                                    | [ $f_2, f_{15}$ ]                                                                                         |
| $f_3$                                                          | $(h_A^+)^2 \cdot (r_{pB}^+)^3 \cdot \exp(I_B^-)$                 | 3-D                                    | [ $f_2, f_3, f_{15}$ ]                                                                                    |
| $f_4$                                                          | $(I_A^+)^3 \cdot (I_A^+)^3 \cdot \exp(r_{pB}^+)$                 | 4-D                                    | [ $f_2, f_3, f_{11}, f_{15}$ ]                                                                            |
| $f_5$                                                          | $(r_{pB}^+)^3 \cdot \sqrt{(h_A^+)} \cdot \exp(I_B^-)$            | 5-D                                    | [ $f_1, f_3, f_9, f_{12}, f_{15}$ ]                                                                       |
| $f_6$                                                          | $(r_{dA}^+)^3 \cdot \exp(r_{pB}^-) \cdot \exp(I_A^-)$            | 6-D                                    | [ $f_1, f_3, f_6, f_8, f_{12}, f_{15}$ ]                                                                  |
| $f_7$                                                          | $(\chi_A^+)^3 \cdot \exp(r_{dB}^+) \cdot \exp(I_A^-)$            | 7-D                                    | [ $f_1, f_2, f_3, f_6, f_8, f_{12}, f_{15}$ ]                                                             |
| $f_8$                                                          | $\sqrt{(h_A^-)} \cdot \ln(1 + \chi_A^-) \cdot \ln(1 + I_A^-)$    | 8-D                                    | [ $f_1, f_2, f_3, f_6, f_8, f_{11}, f_{12}, f_{15}$ ]                                                     |
| $f_9$                                                          | $(h_B^+)^2 \cdot (\chi_A^+)^3 \cdot \ln(1 + I_A^-)$              | 9-D                                    | [ $f_1, f_2, f_3, f_6, f_8, f_{10}, f_{11}, f_{12}, f_{15}$ ]                                             |
| $f_{10}$                                                       | $(I_A^+)^3 \cdot (I_A^+)^3 \cdot \ln(1 + I_A^-)$                 | 10-D                                   | [ $f_1, f_2, f_3, f_6, f_8, f_{11}, f_{12}, f_{13}, f_{15}, f_{16}$ ]                                     |
| $f_{11}$                                                       | $(\chi_A^+)^3 \cdot \sqrt{(I_A^-)} \cdot \exp(h_B^-)$            | 11-D                                   | [ $f_1, f_2, f_3, f_6, f_8, f_{11}, f_{12}, f_{13}, f_{14}, f_{15}, f_{16}$ ]                             |
| $f_{12}$                                                       | $(r_{dB}^+)^3 \cdot (h_B^+)^3 \cdot (I_B^-)^3$                   | 12-D                                   | [ $f_1, f_2, f_3, f_6, f_8, f_{10}, f_{11}, f_{12}, f_{13}, f_{14}, f_{15}, f_{16}$ ]                     |
| $f_{13}$                                                       | $\sqrt{(\chi_A^+)} \cdot \sqrt{(h_B^+)} \cdot \sqrt{(r_{sA}^+)}$ | 13-D                                   | [ $f_1, f_2, f_3, f_6, f_7, f_8, f_{10}, f_{11}, f_{12}, f_{13}, f_{14}, f_{15}, f_{16}$ ]                |
| $f_{14}$                                                       | $(I_A^+)^2 \cdot (r_{pB}^+)^3 \cdot \exp(I_B^-)$                 | 14-D                                   | [ $f_1, f_2, f_3, f_6, f_7, f_8, f_9, f_{10}, f_{11}, f_{12}, f_{13}, f_{14}, f_{15}, f_{16}$ ]           |
| $f_{15}$                                                       | $(\chi_B^+)^2 \cdot \sqrt{(\chi_A^+)} \cdot \sqrt{(L_B^+)}$      | 15-D                                   | [ $f_1, f_2, f_3, f_5, f_6, f_7, f_8, f_9, f_{10}, f_{11}, f_{12}, f_{13}, f_{14}, f_{15}, f_{16}$ ]      |
| $f_{16}$                                                       | $(r_{dB}^+)^2 \cdot \sqrt{(I_A^-)} \cdot \exp(L_B^-)$            | 16-D                                   | [ $f_1, f_2, f_3, f_4, f_5, f_6, f_7, f_8, f_9, f_{10}, f_{11}, f_{12}, f_{13}, f_{14}, f_{15}, f_{16}$ ] |

## References

1. Castelli, I.E., Olsen, T., Datta, S., Landis, D.D., Dahl, S., Thygesen, K.S., Jacobsen, K.W. Energy Environ. Sci. 5, 5814 (2012).
